# Supplementary material
Source: Springer Nature journal article supplement (https://www.springermedizin.de/resource/supplementary/12885_2010_2544_MOESM2_ESM.pdf/9462532)

**Relative Luciferase Activity  
(% Control)**

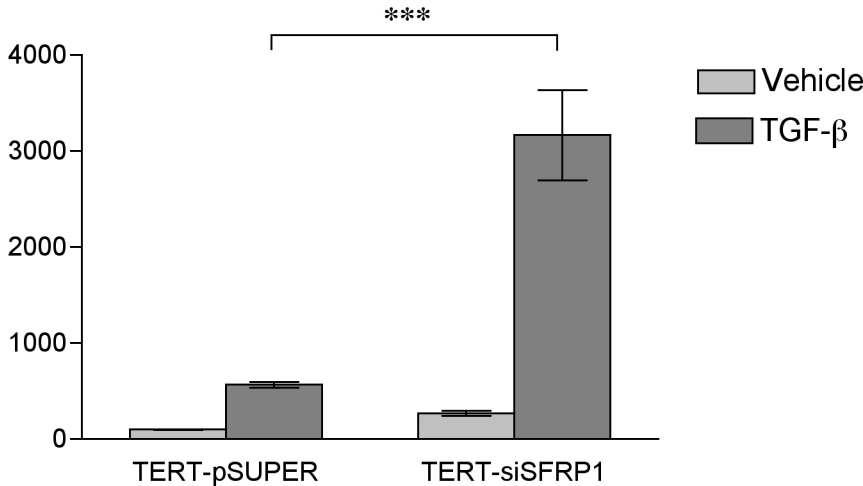

Supplement: MOESM2 [file 9462532]
